# Supplementary material
Source: PubMed Central journal article supplement (PMC3062423)
Supplement: supp_dev.056812_DEV056812TableS1.pdf [file supp_dev.056812_DEV056812TableS1.pdf]

**Table S1. Sequences of the primers and annealing temperatures (T<sub>A</sub>) used in RT-PCR analysis**

| Primer | Sequence                     | T <sub>A</sub> (°C) |
|--------|------------------------------|---------------------|
| a      | GTGCTGTGTGAGTGAACCTATGG      | 65                  |
| b      | AAGTGTTGGCATATCTGGTTCCT      | 66                  |
| c      | CATCAGGCTTGGCAGCAA           | 63                  |
| d      | TGAATTTGGAGTCTGTTTTGTGC      | 61                  |
| e      | CAATCCCTATGTGAGACTCAAGGACT   | 63                  |
| f      | CTTGCCAGCTGTTTACATACTTC      | 62                  |
| g      | TTCAGCGTGATCAAGCAATGTG       | 64                  |
| h      | TACACACCAGAACAAGATTGGG       | 65                  |
| i      | CTTGAAGGACCATTGACCGTATT      | 66                  |
| j      | GCACTTTCCTCTAAATCCAG         | 63                  |
| k      | CAGAGTAGCGAGGACTTGAAGAG      | 63                  |
| l      | ATTATATGGCATGAGTAGGGTAGCAGTG | 66                  |
| m      | GCTTTCCTAGCTTCTGGAGAGAGA     | 63                  |
| n      | ATGTTGATCCTCGGGTCATTTAT      | 64                  |
| o      | TAACAAAGAATTAGACACACAGAC     | 60                  |
