# Supplementary material
Source: PubMed Central journal article supplement (PMC3062423)

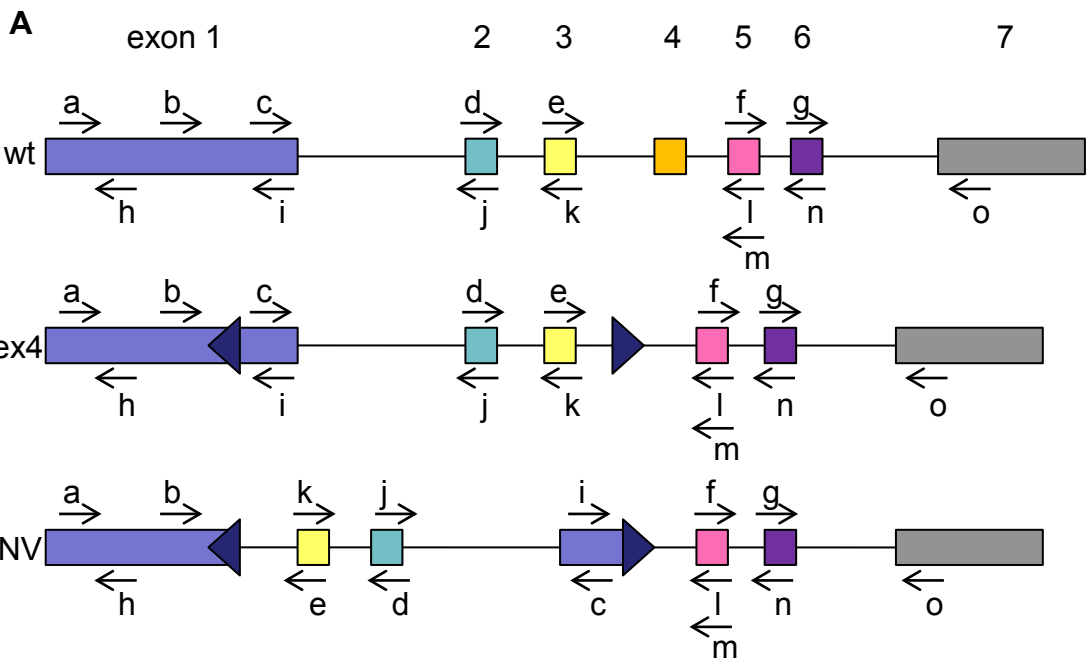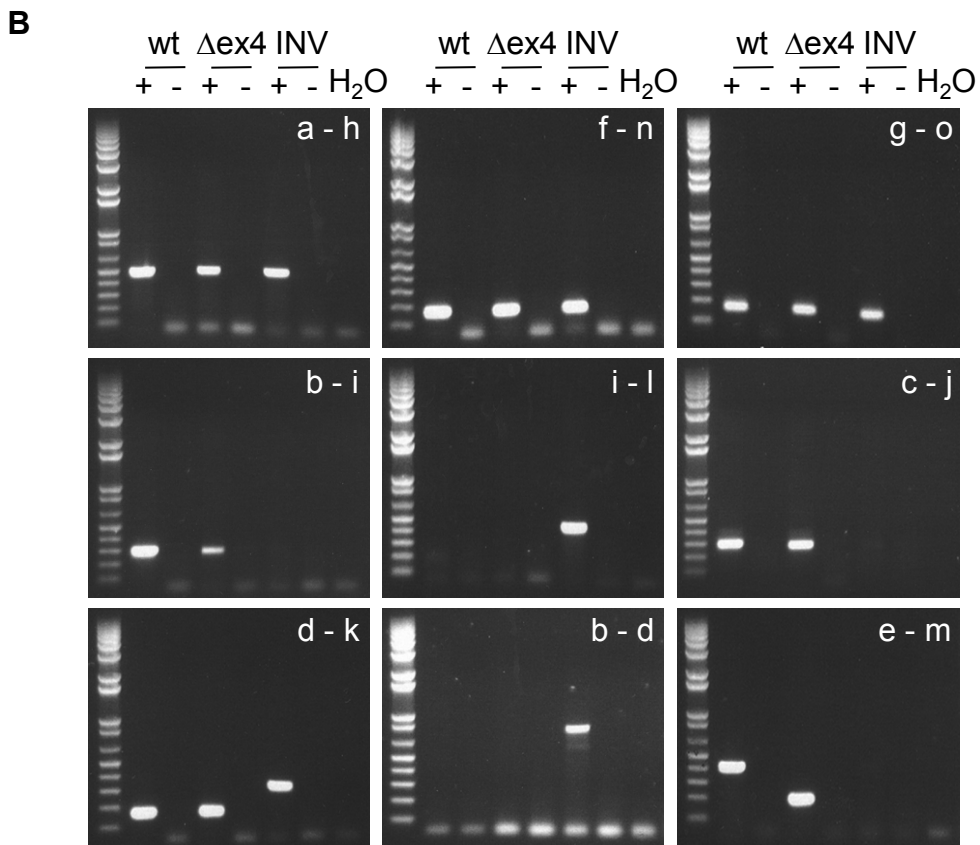

Supplement: supp_dev.056812_DEV056812FigS1.pdf [file supp_dev.056812_DEV056812FigS1.pdf]

**A**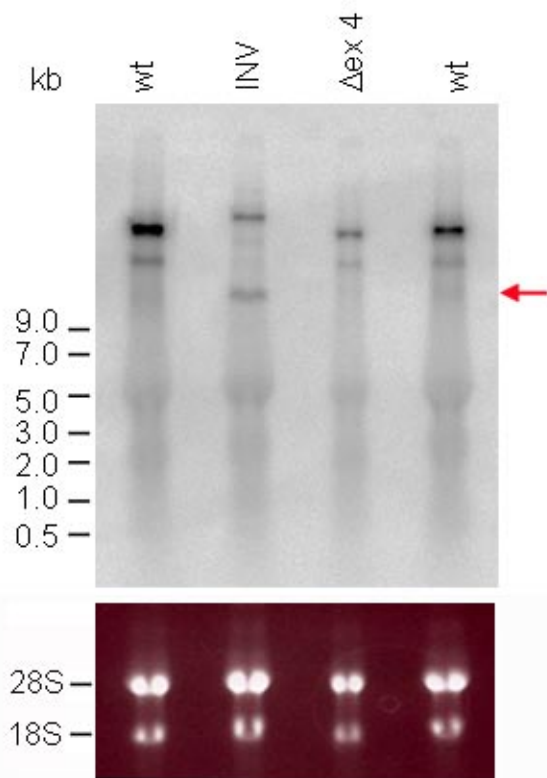**B**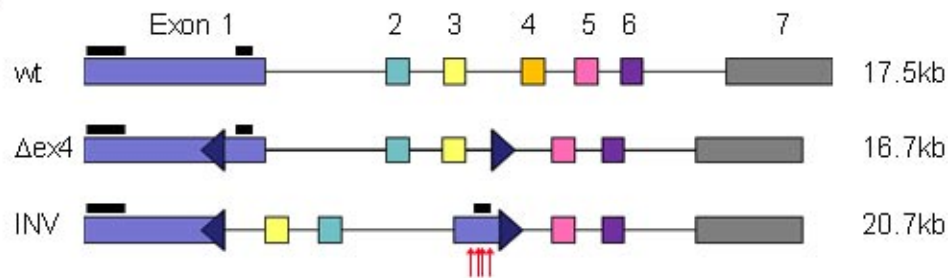

Supplement: supp_dev.056812_DEV056812FigS2.pdf [file supp_dev.056812_DEV056812FigS2.pdf]

H3K27me3

H2AK119u1

DAPI

merge

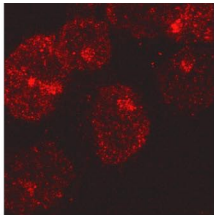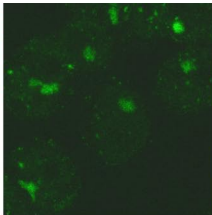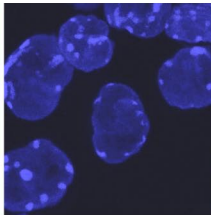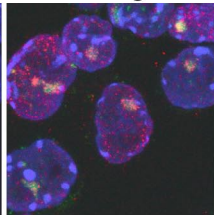

Supplement: supp_dev.056812_DEV056812FigS3.pdf [file supp_dev.056812_DEV056812FigS3.pdf]

**A**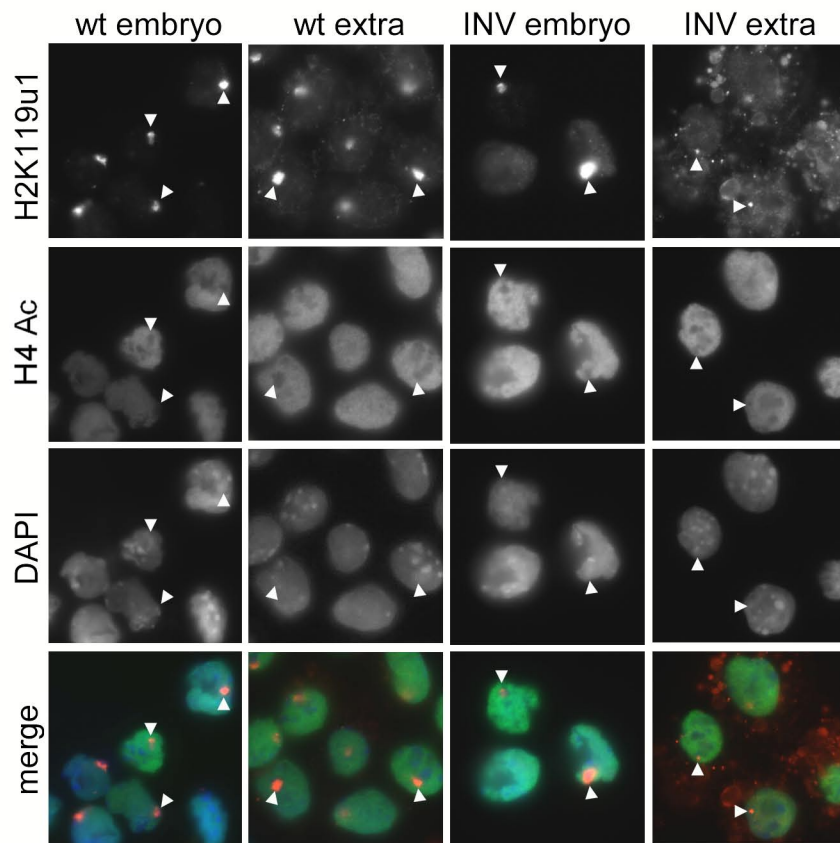**B**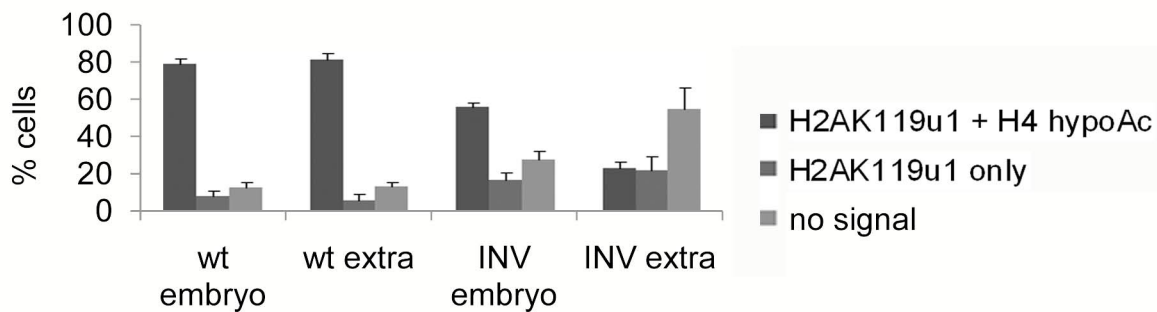

Supplement: supp_dev.056812_DEV056812FigS4.pdf [file supp_dev.056812_DEV056812FigS4.pdf]
